# Supplementary material
Source: bioRxiv or medRxiv preprint supplement (https://www.medrxiv.org/highwire/filestream/91691/field_highwire_adjunct_files/0/2020.06.09.20125237-1.pdf)
Supplement: Supplementary file [file 2020.06.09.20125237-1.pdf]

## Supplemental file: search terms

### COVID-19 related mortality and spread of disease in long-term care: first findings from a living systematic review of emerging evidence

Maximilian Salcher-Konrad, Arnoupe Jhass, Huseyin Naci, Marselia Tan, Yousef El-Tawil, Adelina Comas-Herrera

#### MEDLINE via PubMed

Searched on 1 May 2020.

| #  | Search term                                                                                                                                                                                                                                                                                                                                                                                                                                                                                                                                                                                                                                                                                                                                                                                            | No. of hits |
|----|--------------------------------------------------------------------------------------------------------------------------------------------------------------------------------------------------------------------------------------------------------------------------------------------------------------------------------------------------------------------------------------------------------------------------------------------------------------------------------------------------------------------------------------------------------------------------------------------------------------------------------------------------------------------------------------------------------------------------------------------------------------------------------------------------------|-------------|
| 1  | ("COVID-19"[Supplementary Concept] OR "severe acute respiratory syndrome coronavirus 2"[Supplementary Concept] OR ("Coronavirus"[MeSH Terms] OR "Coronavirus Infections"[Mesh:NoExp] OR pneumonia virus*[tiab] OR cov[tiab]) AND (outbreak[tiab] OR wuhan[tiab] OR novel[all] OR 19[tiab] OR 2019[tiab] OR epidem*[tiab] OR epidemy[all] OR epidemic*[all] OR pandem*[all] OR new[tiab])) OR coronavirus*[tiab] OR corona virus*[tiab] OR ncov[tiab] OR 2019ncov[tiab] OR covid19[tiab] OR "covid 19"[tiab] OR "sars cov 2"[tiab] OR sars2[tiab] OR "ncov 2019"[tiab] OR "sars coronavirus 2"[tiab] OR "sars corona virus 2"[tiab] OR "severe acute respiratory syndrome cov 2"[tiab] OR "severe acute respiratory syndrome cov2"[tiab] OR severe acute respiratory syndrome cov*[tiab] OR cov2[tiab]) | 21525       |
| 2  | "Residential Facilities"[Mesh] OR "Long-Term Care"[Mesh] OR "Housing for the Elderly"[Mesh] OR "Institutionalization"[Mesh] OR "Home Care Services"[Mesh] OR "Home Nursing"[Mesh] OR "Geriatric Nursing"[Mesh] OR "Adult Day Care Centers"[Mesh]                                                                                                                                                                                                                                                                                                                                                                                                                                                                                                                                                       | 132210      |
| 3  | (intermediate[tw] OR "long term"[tw] OR longterm[tw] OR institution*[tw] OR home[tw] OR day[tw]) AND care[tw]                                                                                                                                                                                                                                                                                                                                                                                                                                                                                                                                                                                                                                                                                          | 391913      |
| 4  | ("old age"[tw] OR "old people*" [tw] OR "old folk*" [tw] OR elderly[tw] OR aged[tw] OR geriatric[tw] OR retirement[tw] OR nursing[tw]) AND (home[tw] OR homes[tw] OR institution*[tw] OR facility[tw] OR facilities[tw] OR house[tw] OR housing[tw] OR "home care"[tw])                                                                                                                                                                                                                                                                                                                                                                                                                                                                                                                                | 335549      |
| 5  | #2 OR #3 OR #4                                                                                                                                                                                                                                                                                                                                                                                                                                                                                                                                                                                                                                                                                                                                                                                         | 631742      |
| 6  | #1 AND #5                                                                                                                                                                                                                                                                                                                                                                                                                                                                                                                                                                                                                                                                                                                                                                                              | 442         |
| 7  | #6 AND ("2020/01/01"[PDAT] : "3000/12/31"[PDAT])                                                                                                                                                                                                                                                                                                                                                                                                                                                                                                                                                                                                                                                                                                                                                       | 270         |
| 8  | ("animals"[MeSH Terms] NOT "humans"[MeSH Terms])                                                                                                                                                                                                                                                                                                                                                                                                                                                                                                                                                                                                                                                                                                                                                       | 4695081     |
| 9  | (editorial[pt] OR comment[pt] OR letter[pt] OR newspaper article[pt])                                                                                                                                                                                                                                                                                                                                                                                                                                                                                                                                                                                                                                                                                                                                  | 1850290     |
| 10 | #7 NOT #8 NOT #9                                                                                                                                                                                                                                                                                                                                                                                                                                                                                                                                                                                                                                                                                                                                                                                       | 240         |

## EMBASE via OVID

Searched on 1 May 2020.

| #  | Search term                                                                                                                                                                                                            | No. of hits |
|----|------------------------------------------------------------------------------------------------------------------------------------------------------------------------------------------------------------------------|-------------|
| 1  | (exp coronavirinae/ or coronavirus infection/ or (coronavirus* or corona virus* or pneumonia virus* or cov or ncov).ti,ab,kw.) and (outbreak or wuhan or pandemic).ti,ab,kw.                                           | 3311        |
| 2  | ((covid19 or covid 19 or coronavirus* or corona virus*) and "2019").ti,ab,kw.                                                                                                                                          | 1624        |
| 3  | (sars cov 2 OR sars OR coronavirus* OR corona virus* OR ncov 2019 OR ncov OR sars coronavirus 2 OR sars corona virus 2 OR severe acute respiratory syndrome cov 2 OR severe acute respiratory syndrome cov2).ti,ab,kw. | 21202       |
| 4  | 1 or 2 or 3                                                                                                                                                                                                            | 21634       |
| 5  | nursing home/                                                                                                                                                                                                          | 51059       |
| 6  | residential home/                                                                                                                                                                                                      | 6967        |
| 7  | home for the aged/ or institutionalization/ or exp elderly care/                                                                                                                                                       | 82092       |
| 8  | exp home care/ or exp day care/                                                                                                                                                                                        | 83914       |
| 9  | exp geriatric nursing/                                                                                                                                                                                                 | 12192       |
| 10 | ((intermediate or long term or longterm or institution* or day or home) adj2 care).ti,ab,kw.                                                                                                                           | 85574       |
| 11 | ((old age or old people* or old folk* or elderly or aged or geriatric or retirement or nursing) adj2 (home or homes or institution* or facility or facilities or house or housing or home care)).ti,ab,kw.             | 53975       |
| 12 | 5 or 6 or 7 or 8 or 9 or 10 or 11                                                                                                                                                                                      | 260625      |
| 13 | 4 and 12                                                                                                                                                                                                               | 124         |
| 14 | limit 13 to yr="2020"                                                                                                                                                                                                  | 30          |
| 15 | editorial.pt.                                                                                                                                                                                                          | 649655      |
| 16 | 14 not 15                                                                                                                                                                                                              | 28          |

## Global Health via OVID

Searched on 1 May 2020.

| # | Search term | No. of hits |
|---|-------------|-------------|
|---|-------------|-------------|

|    |                                                                                                                                                                                                                        |          |
|----|------------------------------------------------------------------------------------------------------------------------------------------------------------------------------------------------------------------------|----------|
| 1  | (exp coronavirinae/ or exp Severe acute respiratory syndrome coronavirus/ or (coronavirus* or corona virus* or pneumonia virus* or cov or ncov).ti,ab,hw.) and (outbreak or wuhan or pandemic).ti,ab,hw.               | 1229     |
| 2  | ((covid19 or covid 19 or coronavirus* or corona virus*) and "2019").ti,ab,hw.                                                                                                                                          | 54       |
| 3  | (sars cov 2 OR sars OR coronavirus* OR corona virus* OR ncov 2019 OR ncov OR sars coronavirus 2 OR sars corona virus 2 OR severe acute respiratory syndrome cov 2 OR severe acute respiratory syndrome cov2).ti,ab,hw. | 6217     |
| 4  | 1 or 2 or 3                                                                                                                                                                                                            | 6239     |
| 5  | nursing homes/                                                                                                                                                                                                         | 2803     |
| 6  | retirement homes/                                                                                                                                                                                                      | 73       |
| 7  | residential institutions/                                                                                                                                                                                              | 424      |
| 8  | long term care/                                                                                                                                                                                                        | 746      |
| 9  | home care/                                                                                                                                                                                                             | 1793     |
| 10 | exp day care/ or day care centres/                                                                                                                                                                                     | 1252     |
| 11 | ((intermediate or long term or longterm or institution* or day or home) adj2 care).ti,ab,hw.                                                                                                                           | 10506    |
| 12 | ((old age or old people* or old folk* or elderly or aged or geriatric or retirement or nursing) adj2 (home or homes or institution* or facility or facilities or house or housing or home care)).ti,ab,hw.             | 5906     |
| 13 | 5 or 6 or 7 or 8 or 9 or 10 or 11 or 12                                                                                                                                                                                | 15443    |
| 14 | 4 and 13                                                                                                                                                                                                               | 44       |
| 15 | <b>Limit 14 to yr="2020"</b>                                                                                                                                                                                           | <b>1</b> |

## Web of Science

Searched on 1 May 2020.

| # | Search term                                                                                                                                                  | No. of hits |
|---|--------------------------------------------------------------------------------------------------------------------------------------------------------------|-------------|
| 1 | TS=((coronavirus* OR "severe acute respiratory syndrome*" OR corona virus* or pneumonia virus* or cov or ncov or covid) and (outbreak or wuhan or pandemic)) | 14545       |
| 2 | TS=((coronavirus* or corona virus*) and 2019)                                                                                                                | 2601        |
| 3 | TS=(covid19 or covid 19 or covid-19)                                                                                                                         | 7374        |

|    |                                                                                                                                                                                                                 |           |
|----|-----------------------------------------------------------------------------------------------------------------------------------------------------------------------------------------------------------------|-----------|
| 4  | TS=(sars cov 2 OR sars OR coronavirus* OR corona virus* OR ncov 2019 OR ncov OR sars coronavirus 2 OR sars corona virus 2 OR severe acute respiratory syndrome cov 2 OR severe acute respiratory syndrome cov2) | 40104     |
| 5  | #4 OR #3 OR #2 OR #1                                                                                                                                                                                            | 47695     |
| 6  | TS=((nursing OR retire* OR geriatric OR aged OR elderly) NEAR/2 (home OR homes OR institution* OR facility OR facilities OR house OR housing))                                                                  | 113749    |
| 7  | TS=((old age) NEAR/2 (home OR homes OR institution* OR facility OR facilities OR house OR housing))                                                                                                             | 79193     |
| 8  | TS=((old people*) NEAR/2 (home OR homes OR institution* OR facility OR facilities OR house OR housing))                                                                                                         | 25555     |
| 9  | TS=((old folk*) NEAR/2 (home OR homes OR institution* OR facility OR facilities OR house OR housing))                                                                                                           | 333       |
| 10 | TS=((intermediate or (long NEAR/o term) or longterm or (long-term) or institution* or day or home) NEAR/2 (care))                                                                                               | 167554    |
| 11 | #10 OR #9 OR #8 OR #7 OR #6                                                                                                                                                                                     | 302983    |
| 12 | #11 AND #5                                                                                                                                                                                                      | 439       |
| 13 | <b>limit 12 to Publication Year 2020</b>                                                                                                                                                                        | <b>81</b> |

#### CINAHL Plus via EBSCOhost

Searched on 1 May 2020.

| # | Search term                                                                                                                                                                                        | No. of hits |
|---|----------------------------------------------------------------------------------------------------------------------------------------------------------------------------------------------------|-------------|
| 1 | ((MH "Coronavirus Infections+") OR (MH "Coronaviridae+"))                                                                                                                                          | 3509        |
| 2 | TX ((coronavirus* or corona virus* or pneumonia virus* or cov or ncov))                                                                                                                            | 16263       |
| 3 | S1 OR S2 AND TX (outbreak or wuhan or pandemic)                                                                                                                                                    | 7486        |
| 4 | TX (covid#19 OR covid 19 OR ((coronavirus* OR corona virus*) AND 2019))                                                                                                                            | 1680        |
| 5 | TX (sars cov 2 OR sars OR coronavirus* OR corona virus* OR ncov OR sars coronavirus 2 OR sars corona virus 2 OR severe acute respiratory syndrome cov 2 OR severe acute respiratory syndrome cov2) | 16220       |
| 6 | S3 OR S4 OR S5                                                                                                                                                                                     | 20538       |
| 7 | (MH "Residential Facilities+")                                                                                                                                                                     | 34493       |
| 8 | (MH "Housing for the Elderly")                                                                                                                                                                     | 3704        |
| 9 | (MH "Nursing Home Patients")                                                                                                                                                                       | 15292       |

|    |                                                                                                                                                            |            |
|----|------------------------------------------------------------------------------------------------------------------------------------------------------------|------------|
| 10 | (MH "Long Term Care") OR (MH "Day Care") OR (MH "Home Nursing") OR (MH "Home Nursing, Professional")                                                       | 42321      |
| 11 | (MH "Gerontologic Care") OR (MH "Gerontologic Nursing")                                                                                                    | 39001      |
| 12 | TX ((intermediate or long term or long#term or institution* or home or day) N2 care)                                                                       | 210815     |
| 13 | TX ((old age or old people or old folk or elderly or aged or geriatric or retirement or nursing) N2 (home or institution or facility or house or housing)) | 133909     |
| 14 | S7 OR S8 OR S9 OR S10 OR S11 OR S12 OR S13                                                                                                                 | 304213     |
| 15 | S14 AND S6                                                                                                                                                 | 2426       |
| 16 | <b>limit S15 to publication year=2020</b>                                                                                                                  | <b>108</b> |

### WHO COVID-19 research database

Searched on 1 May 2020.

| # | Search term                                                                                                                                                                                                                                                                                                                                                 | No. of hits |
|---|-------------------------------------------------------------------------------------------------------------------------------------------------------------------------------------------------------------------------------------------------------------------------------------------------------------------------------------------------------------|-------------|
| 1 | tw:("nursing home" OR "nursing homes" OR "skilled nursing" OR "extended care")                                                                                                                                                                                                                                                                              | 28          |
| 2 | tw:(long term care)                                                                                                                                                                                                                                                                                                                                         | 7           |
| 3 | tw:("care home" OR "care homes" or "home care")                                                                                                                                                                                                                                                                                                             | 29          |
| 4 | tw:(("old age" OR "old people" OR "old folk" OR elderly OR aged OR geriatric OR retirement) AND (home OR homes OR institution OR facility OR facilities OR house OR housing))                                                                                                                                                                               | 47          |
| 5 | mh:("Long-Term Care" OR "Residential Facilities" OR "Housing for the Elderly" OR "Assisted Living Facilities" OR "Housing for the Elderly" OR "Skilled Nursing Facilities" OR "Nursing Homes" OR "Homes for the Aged" OR "Group Homes" OR "Institutionalization" "Home Care Services" OR "Home Nursing" OR "Geriatric Nursing" OR "Adult Day Care Centers") | 14          |
| 6 | 1 OR 2 OR 3 OR 4 OR 5                                                                                                                                                                                                                                                                                                                                       | 89          |
